# Supplementary material for: Trends in Cannabis Use Disorder Diagnoses in the U.S. Veterans Health Administration, 2005–2019
Source: Atypon-hosted journal article supplement (doi:10.1176/appi.ajp.22010034), 2022-07-28
Supplement: appi.ajp.22010034.ds001.pdf [file appi.ajp.22010034.ds001.pdf]

Data supplement for Hasin et al., Trends in Cannabis Use Disorder Diagnoses in the U.S. Veterans Health Administration, 2005–2019. Am J Psychiatry (doi: 10.1176/appi.ajp.22010034)

TABLE S1. VHA Patient Demographic Characteristics by Age Category, 2005 and 2019

|                         | <b>2005 (N=4,332,160)</b> |         | <b>2019 (N=5,657,272)</b> |         |
|-------------------------|---------------------------|---------|---------------------------|---------|
|                         | n                         | %       | n                         | %       |
| <b>Age &lt;35 years</b> | <b>n=187,692</b>          |         | <b>n=482,749</b>          |         |
| Sex                     |                           |         |                           |         |
| Female                  | 43,221                    | 23.0    | 95,330                    | 19.8    |
| Male                    | 144,471                   | 77.0    | 387,419                   | 80.3    |
| Race/Ethnicity          |                           |         |                           |         |
| White                   | 110,641                   | 59.0    | 286,132                   | 59.3    |
| Black                   | 37,011                    | 19.7    | 80,380                    | 16.7    |
| Hispanic/Latino         | 16,556                    | 8.8     | 64,013                    | 13.3    |
| Other/Multiple          | 7,119                     | 3.8     | 27,335                    | 5.7     |
| Unknown                 | 16,365                    | 8.7     | 24,889                    | 5.2     |
| Age, M(SD)              | 28.2                      | 3.9     | 29.8                      | 3.3     |
| Age, Mdn(IQR)           | 28                        | 25 - 32 | 30                        | 28 - 33 |
| <b>Age 35-64 years</b>  | <b>n=2,015,248</b>        |         | <b>n=2,235,899</b>        |         |
| Sex                     |                           |         |                           |         |
| Female                  | 134,814                   | 6.7     | 346,214                   | 15.5    |
| Male                    | 1,880,434                 | 93.3    | 1,889,685                 | 84.5    |
| Race/Ethnicity          |                           |         |                           |         |
| White                   | 1,407,440                 | 69.8    | 1,305,875                 | 58.4    |
| Black                   | 414,764                   | 20.6    | 575,468                   | 25.7    |
| Hispanic/Latino         | 81,888                    | 4.1     | 170,030                   | 7.6     |
| Other/Multiple          | 54,934                    | 2.7     | 88,906                    | 4.0     |
| Unknown                 | 56,222                    | 2.8     | 95,620                    | 4.3     |
| Age, M(SD)              | 53.9                      | 7.3     | 51.6                      | 8.8     |
| Age, Mdn(IQR)           | 56                        | 49 - 59 | 53                        | 44 - 59 |
| <b>Age ≥65 years</b>    | <b>n=2,129,220</b>        |         | <b>n=2,938,624</b>        |         |
| Sex                     |                           |         |                           |         |
| Female                  | 38,926                    | 1.8     | 81,163                    | 2.8     |
| Male                    | 2,090,294                 | 98.2    | 2,857,461                 | 97.2    |
| Race/Ethnicity          |                           |         |                           |         |
| White                   | 1,889,867                 | 88.8    | 2,386,973                 | 81.2    |
| Black                   | 153,748                   | 7.2     | 361,184                   | 12.3    |
| Hispanic/Latino         | 42,427                    | 2.0     | 108,370                   | 3.7     |
| Other/Multiple          | 37,661                    | 1.8     | 71,756                    | 2.4     |
| Unknown                 | 5,517                     | 0.3     | 10,341                    | 0.4     |
| Age, M(SD)              | 75.8                      | 6.4     | 75.1                      | 7.3     |
| Age, Mdn(IQR)           | 76                        | 71 - 81 | 73                        | 70 - 79 |

FIGURE S1. VHA Patients Diagnosed with Cannabis Use Disorder (CUD), by age group and gender: 1/1/2005-9/30/2015, ICD-9-CM; 10/1/2015-12/31/2019, ICD-10-CM

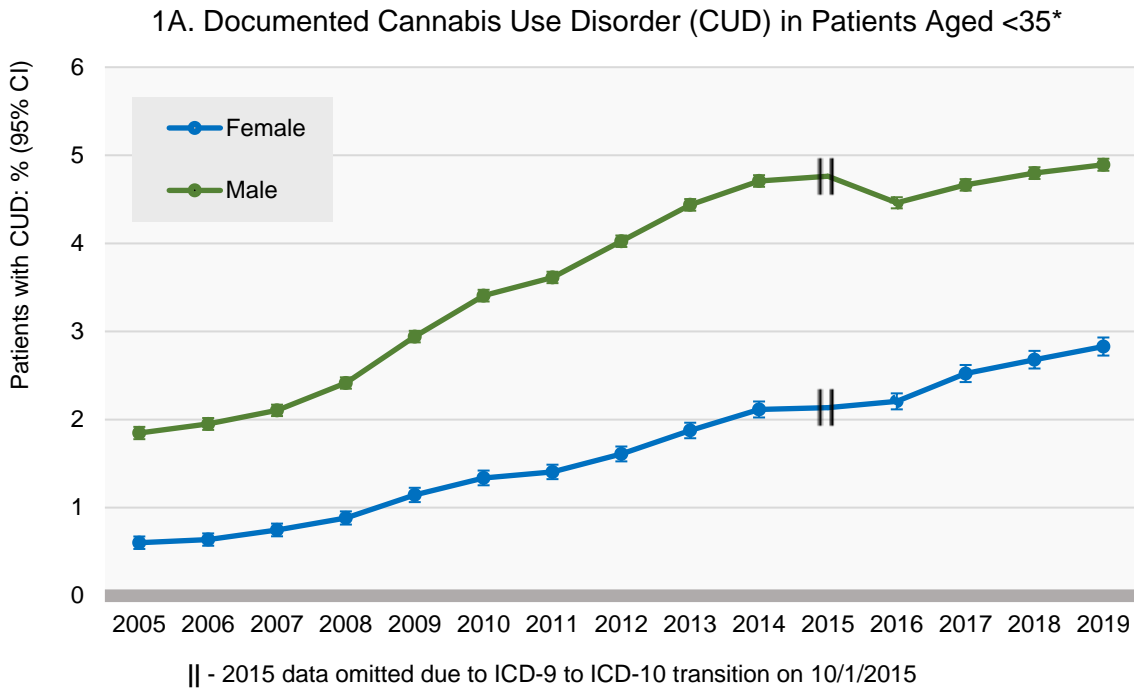

\* Predicted yearly diagnostic prevalences from a logistic regression model that controlled for race/ethnicity and continuous age within each of the 3 main age strata. Confidence intervals are very small due to the large sample sizes

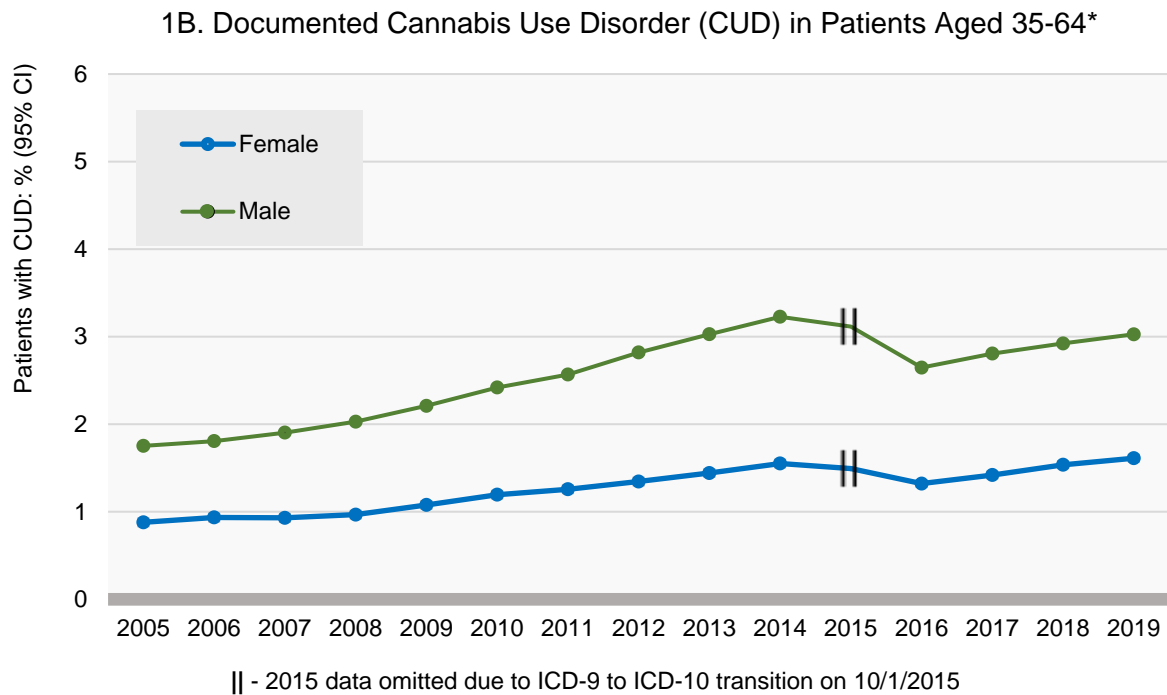

\* Predicted yearly diagnostic prevalences from a logistic regression model that controlled for race/ethnicity and continuous age within each of the 3 main age strata. Confidence intervals are very small due to the large sample sizes

### 1C. Documented Cannabis Use Disorder (CUD) in Patients Aged $\geq 65^*$

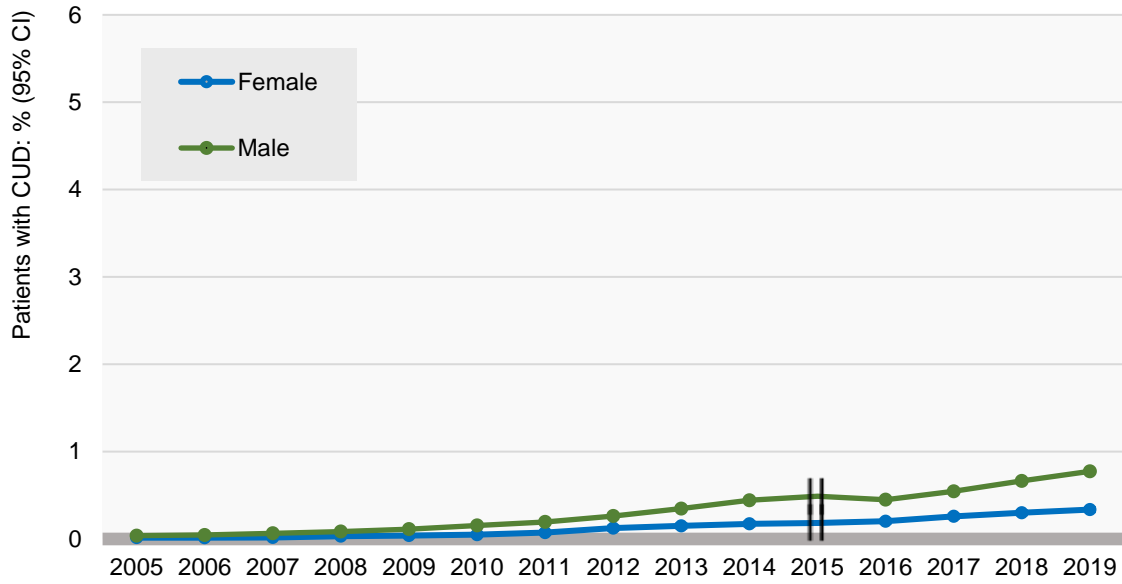

|| - 2015 data omitted due to ICD-9 to ICD-10 transition on 10/1/2015

\* Predicted yearly diagnostic prevalences from a logistic regression model that controlled for race/ethnicity and continuous age within each of the 3 main age strata. Confidence intervals are very small due to the large sample sizes

FIGURE S2. VHA Patients Diagnosed with Cannabis Use Disorder (CUD), by age group and race/ethnicity: 1/1/2005-9/30/2015, ICD-9-CM; 10/1/2015-12/31/2019, ICD-10-CM

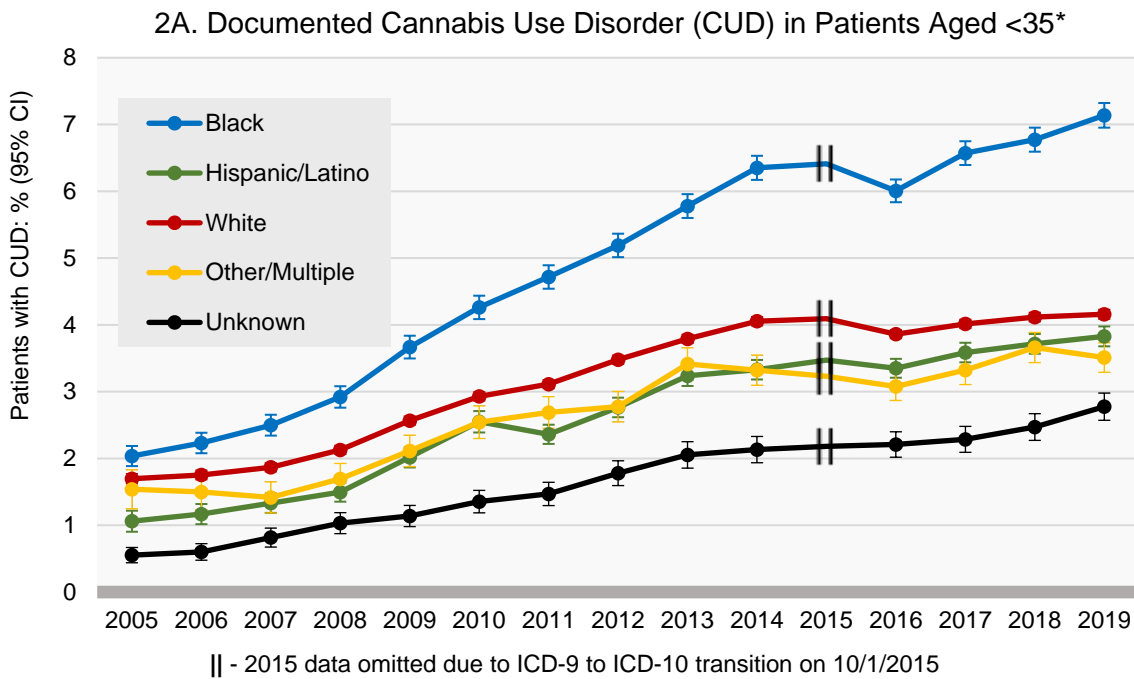

\* Predicted yearly diagnostic prevalences from a logistic regression model that controlled for sex and continuous age within each of the 3 main age strata. Confidence intervals are small due to the large sample sizes

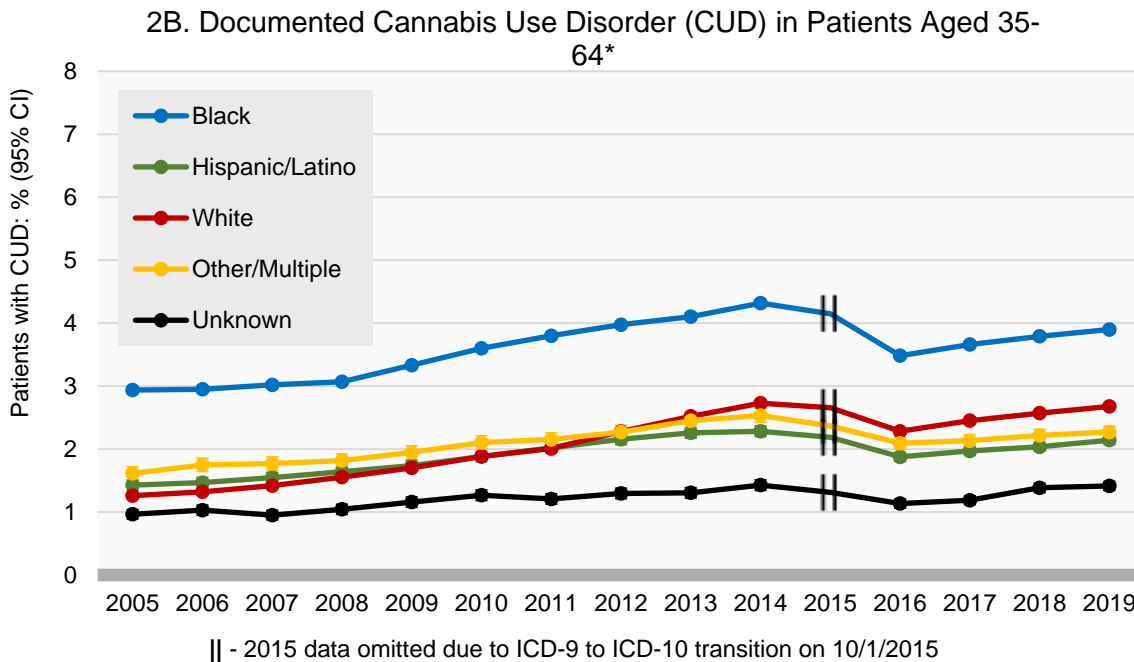

\* Predicted yearly diagnostic prevalences from a logistic regression model that controlled for sex and continuous age within each of the 3 main age strata. Confidence intervals are small due to the large sample sizes

### 2C. Documented Cannabis Use Disorder (CUD) in Patients Aged $\geq 65^*$

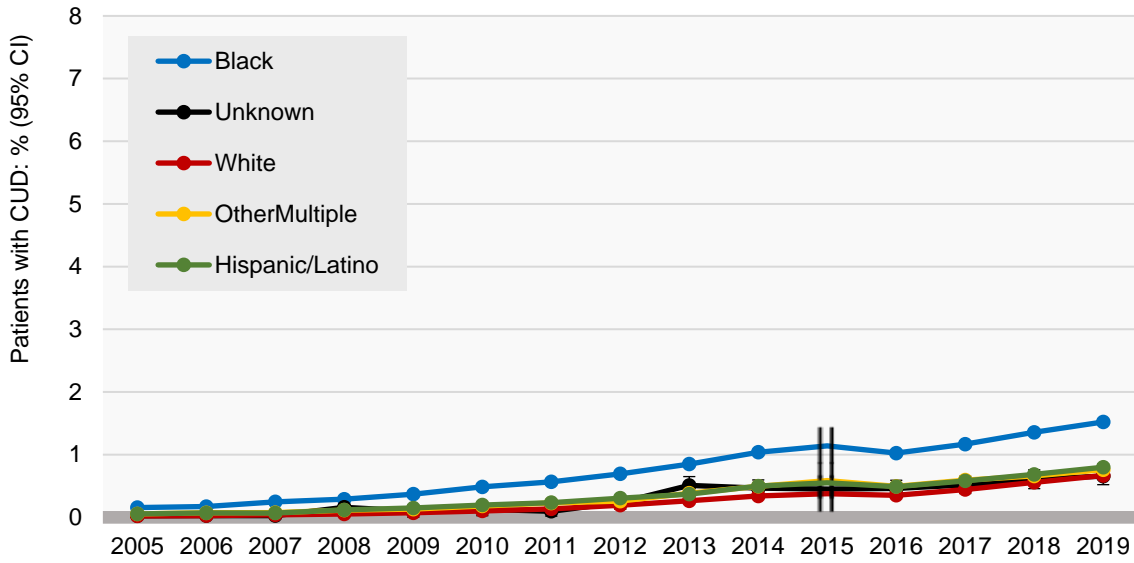

|| - 2015 data omitted due to ICD-9 to ICD-10 transition on 10/1/2015

\* Predicted yearly diagnostic prevalences from a logistic regression model that controlled for sex and continuous age within each of the 3 main age strata. Confidence intervals are small due to the large sample sizes
